# Supplementary material for: Metal–organic-framework-based pyroptosis nanotuner with long blood circulation for augmented chemotherapy
Source: Royal Society of Chemistry journal article supplement (doi:10.1039/d3bm00813d), 2023-01-01
Supplement: d3bm00813d1.pdf [file d3bm00813d1.pdf]

## Supplementary Information

### **Metal-organic framework-based pyroptosis nanotuner with long blood circulation for augmented chemotherapy**

*Weichu Zhu,<sup>a</sup> Jian Xu,<sup>a</sup> Xianxian Yao,<sup>a</sup> Shuting Mai,<sup>a</sup> Dan Shu<sup>a</sup> and Wuli Yang<sup>a,\*</sup>*

*<sup>a</sup> State Key Laboratory of Molecular Engineering of Polymers and Department of Macromolecular Science, Fudan University, 220 Handan Road, Shanghai 200433, P.R.China. Email: wlyang@fudan.edu.cn.*

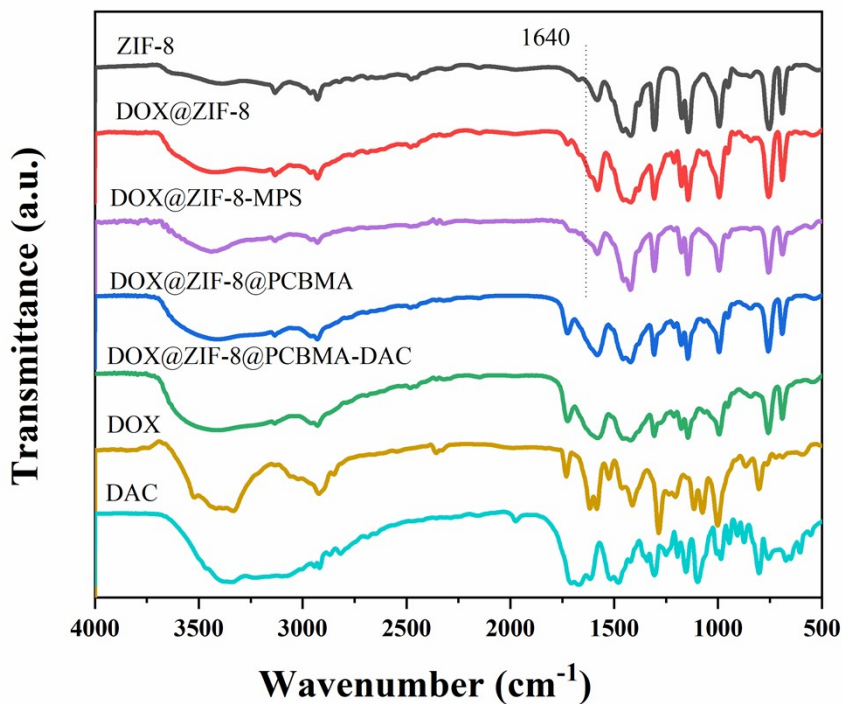

**Fig. S1** FT-IR spectra of DAC, DOX, DOX@ZIF-8, DOX@ZIF-8-MPS, DOX@ZIF-8@PCBMA and DOX@ZIF-8@PCBMA-DAC. The peak at 1640 cm<sup>-1</sup> belongs to carbon-carbon double bonds of MPS.

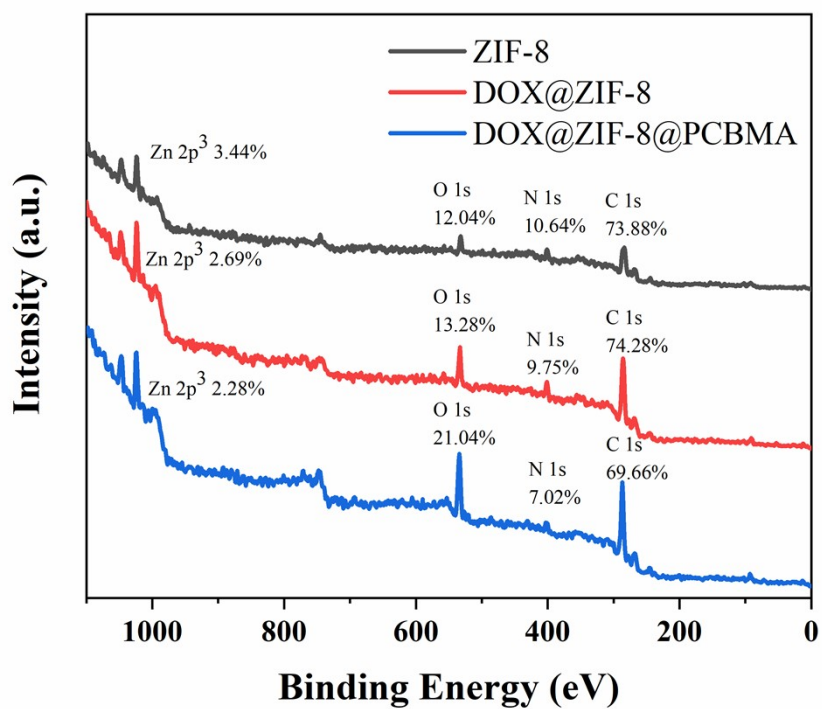

**Fig. S2** XPS spectra of ZIF-8, DOX@ZIF-8 and DOX@ZIF-8@PCBMA.

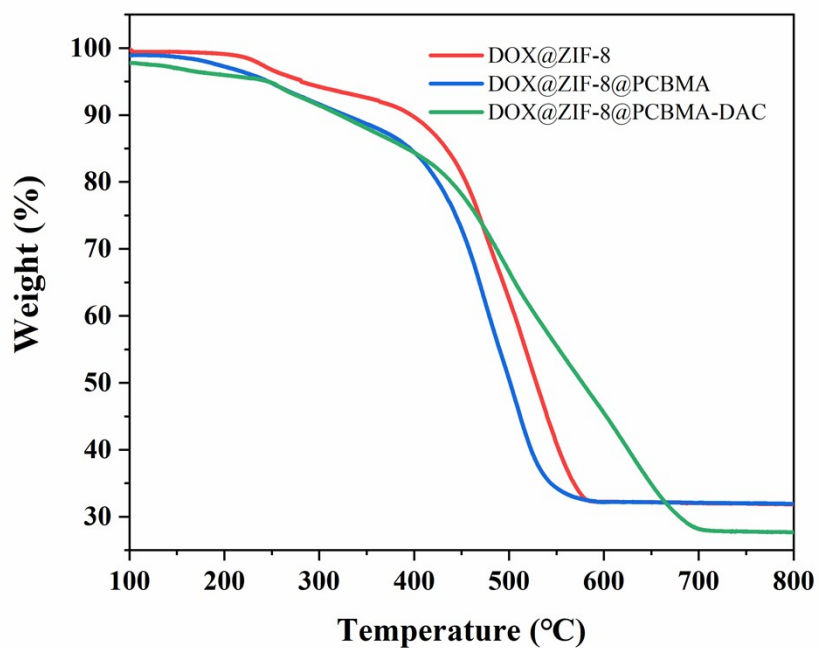

**Fig. S3** TGA analysis of DOX@ZIF-8, DOX@ZIF-8@PCBMA and DOX@ZIF-8@PCBMA-DAC.

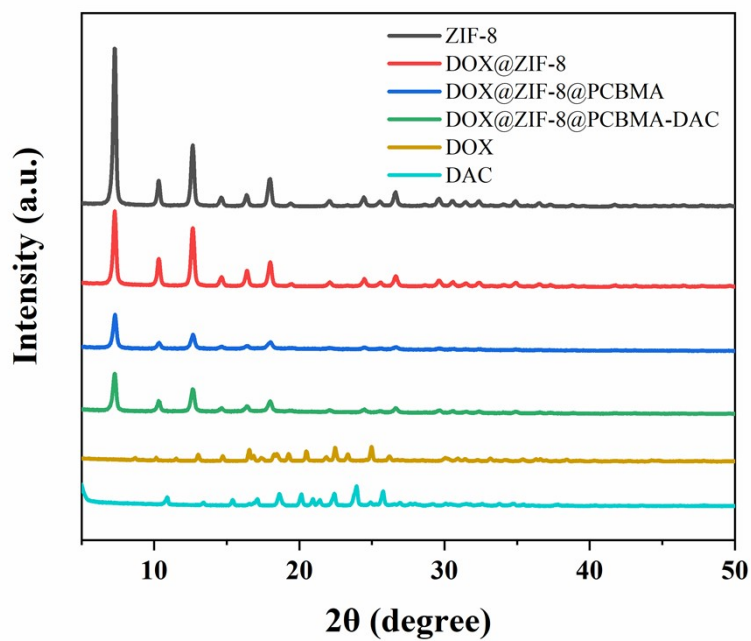

**Fig. S4** XRD patterns of DAC, DOX, ZIF-8, DOX@ZIF-8, DOX@ZIF-8@PCBMA and DOX@ZIF-8@PCBMA-DAC.

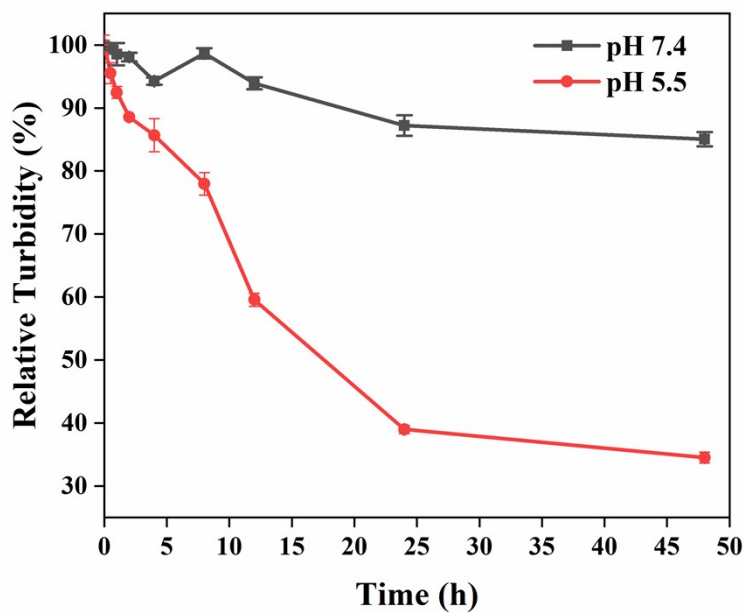

**Fig. S5** The relative turbidity of DOX@ZIF-8@PCBMA after incubation at pH 7.4 and pH 5.5 for various times.

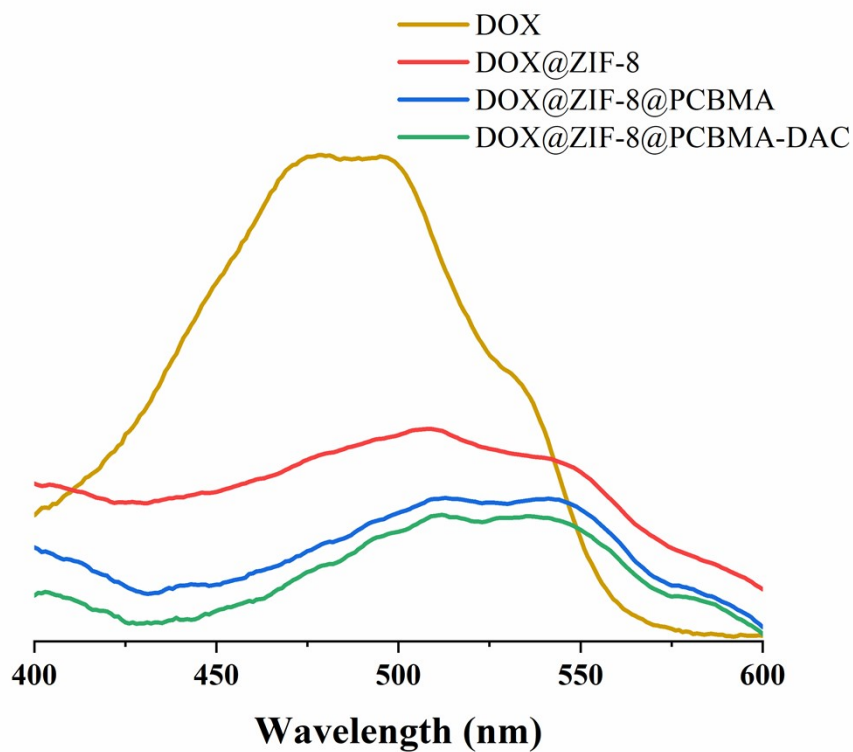

**Fig. S6** UV-Vis spectra of DOX, DOX@ZIF-8, DOX@ZIF-8@PCBMA and DOX@ZIF-8@PCBMA-DAC.

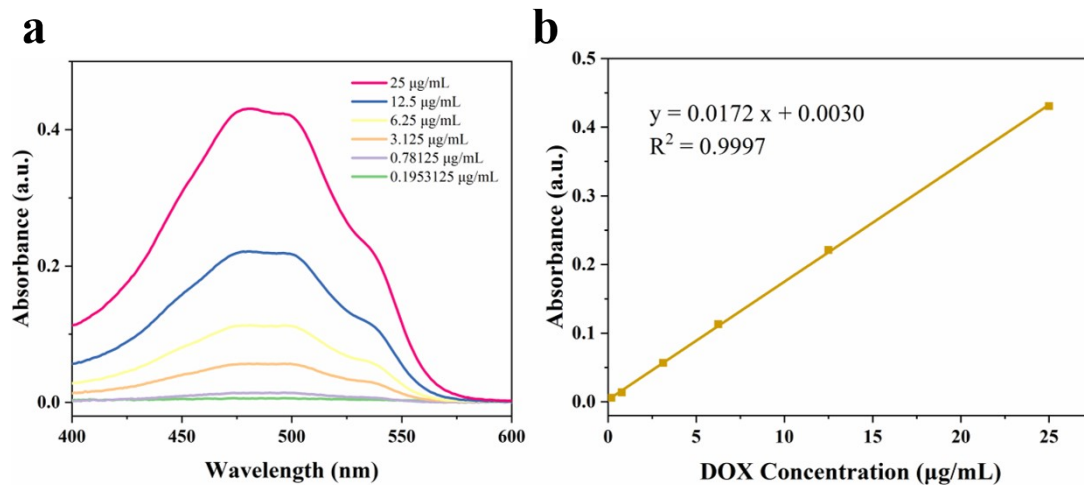

Fig. S7 (a) UV-Vis absorbance spectrum and (b) standard curve of DOX.

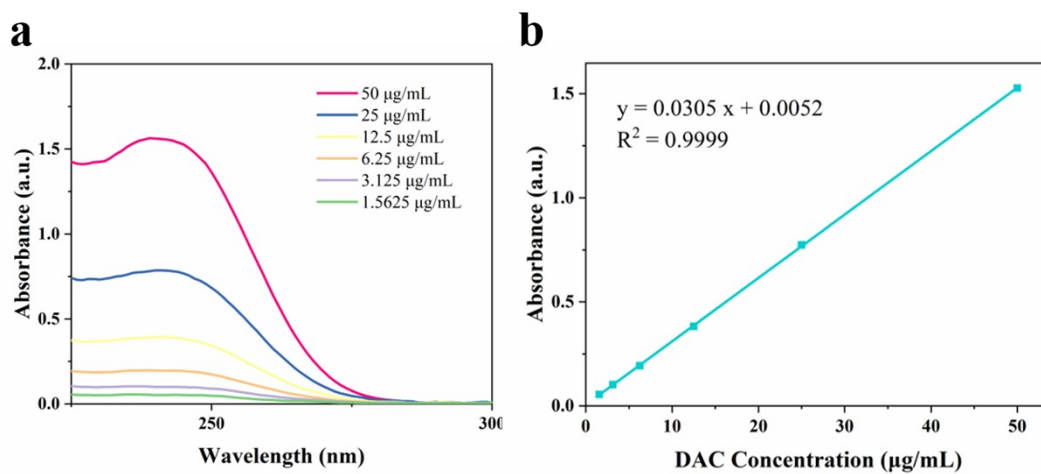

Fig. S8 (a) UV-Vis absorbance spectrum and (b) standard curve of DAC.

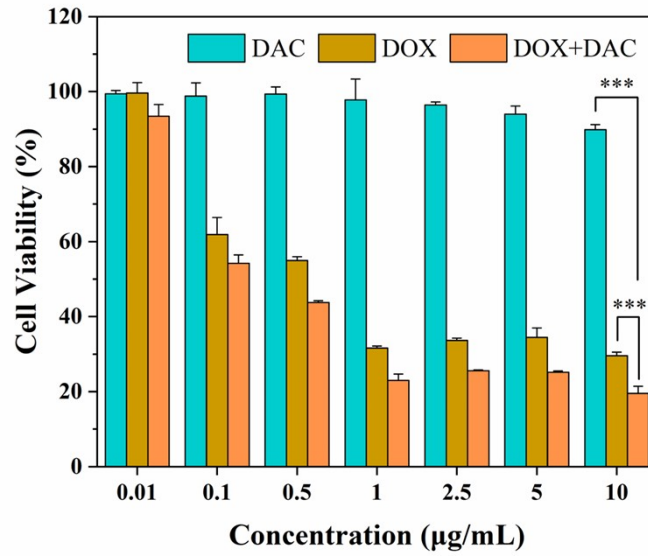

**Fig. S9** Cell viability of EMT6 after incubation with different groups for 24 h.

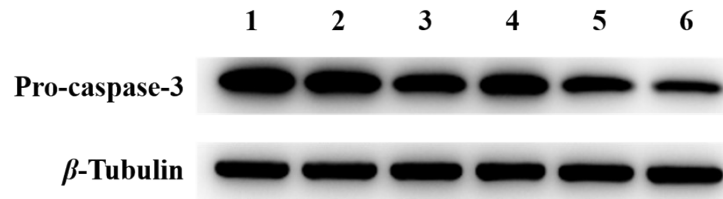

**Fig. S10** Western blot analysis of pro-caspase-3 protein expression in EMT6 cells after incubation with different groups. All groups: (1) control, (2) DAC, (3) DOX, (4) DOX@ZIF-8, (5) DOX@ZIF-8@PCBMA and (6) DOX@ZIF-8@PCBMA-DAC.

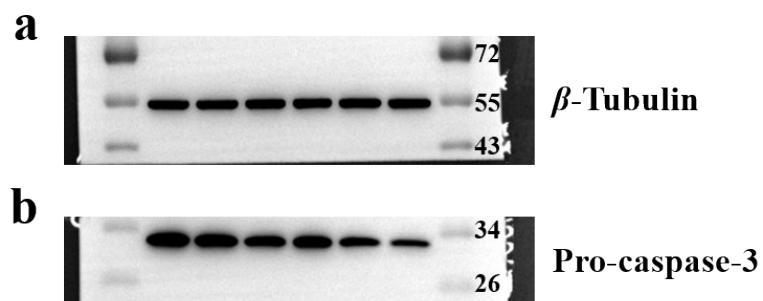

**Fig. S11** Unprocessed images of Western blot results of  $\beta$ -Tubulin and pro-caspase-3 protein expression in EMT6 cells after incubation with different groups.

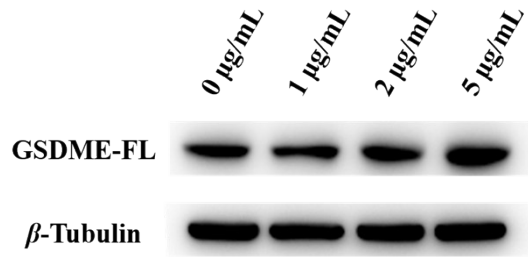

**Fig. S12** Western blot analysis of GSDME-FL protein expression in EMT6 cells after incubation with different concentrations of DAC.

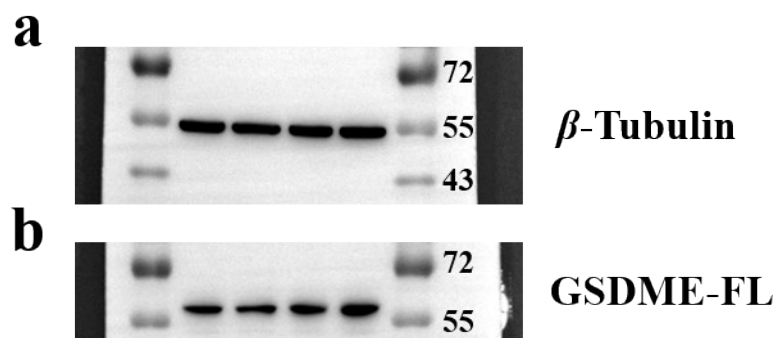

**Fig. S13** Unprocessed images of Western blot results of  $\beta$ -Tubulin and GSDME-FL protein expression in EMT6 cells after incubation with different concentrations of DAC.

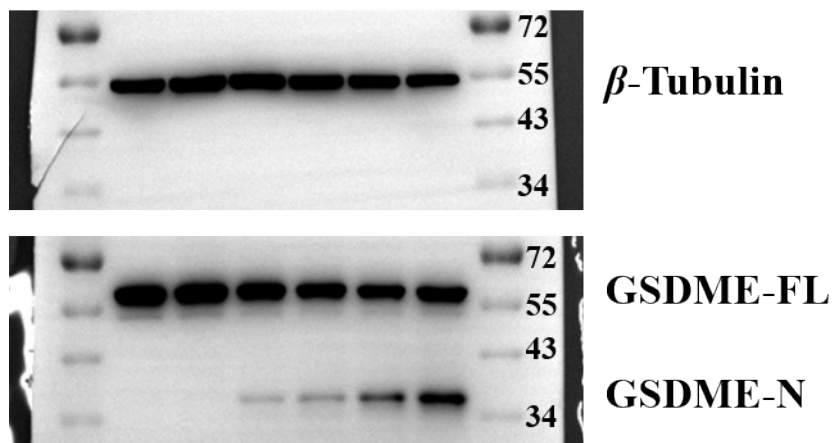

**Fig. S14** Unprocessed images of Western blot results of  $\beta$ -Tubulin, GSDME-FL and GSDME-N after incubation with different groups.

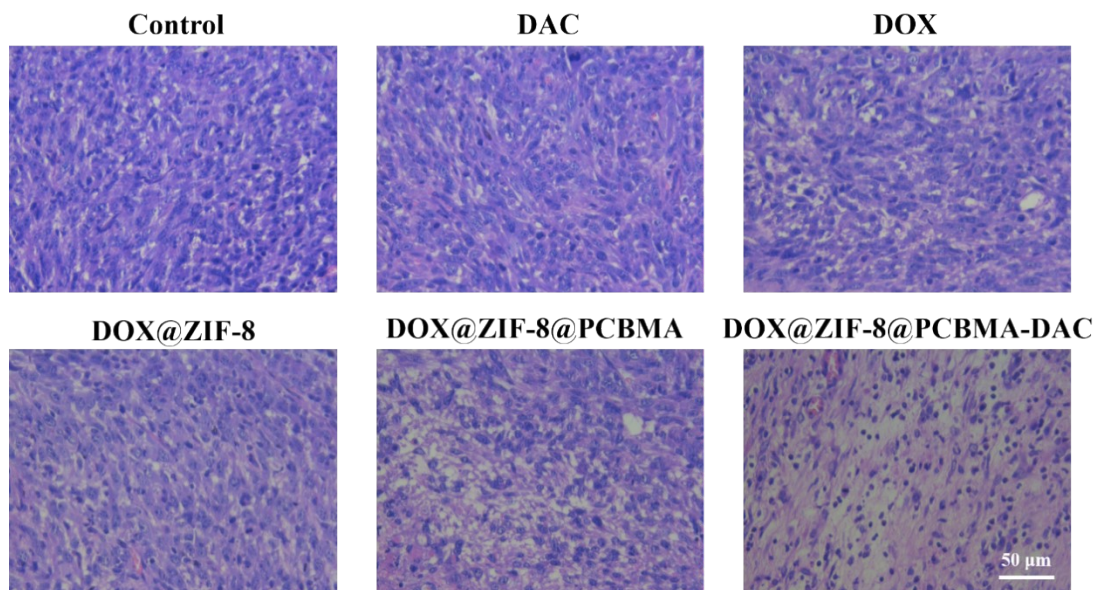

**Fig. S15** The H&E staining of tumor in each group after 14-day treatment.

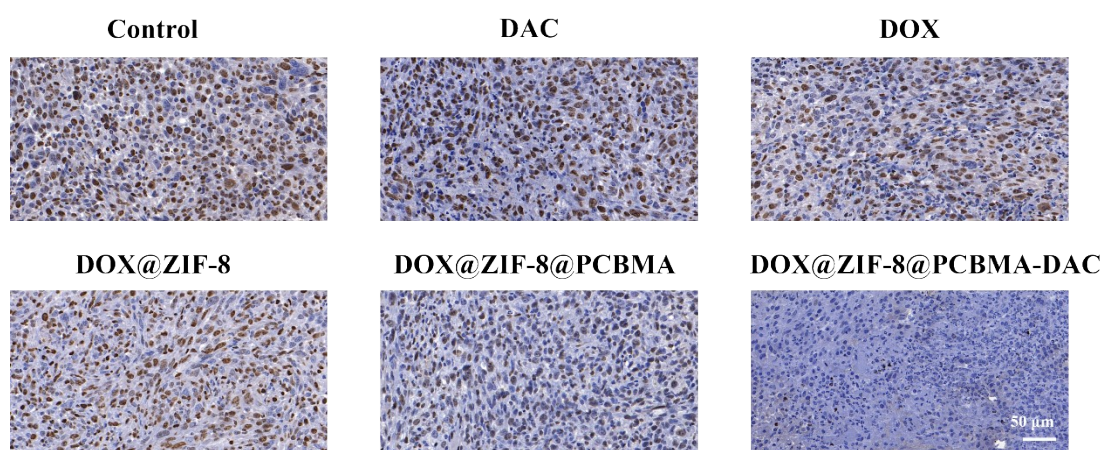

**Fig. S16** The Ki67 staining of tumor in each group after 14-day treatment.

**Table S1.** Recipes and DOX loading efficiency of DOX@ZIF-8.

| Sample | Zn(NO <sub>3</sub> ) <sub>2</sub> ·H <sub>2</sub> O (mg) | 2-methylimidazole (g) | DOX (mg) | Loading efficiency (%) |
|--------|----------------------------------------------------------|-----------------------|----------|------------------------|
| 1      | 200                                                      | 2                     | 10       | 1.8                    |
| 2      | 200                                                      | 2                     | 20       | 5.3                    |
| 3      | 200                                                      | 2                     | 30       | 7.2                    |
| 4      | 200                                                      | 2                     | 40       | 10.6                   |
| 5      | 200                                                      | 2                     | 50       | 12.3                   |



**Table S2.** Whole blood analysis of mice after injection with DOX@ZIF-8@PCBMA for 7 d and 14 d.

|       | <b>Unit</b>         | <b>Control</b> | <b>7 d</b> | <b>14 d</b> |
|-------|---------------------|----------------|------------|-------------|
| WBC   | 10 <sup>9</sup> /L  | 6.0 ± 1.1      | 6.4 ± 0.5  | 6.1 ± 1.2   |
| Lymph | 10 <sup>9</sup> /L  | 5.4 ± 0.3      | 5.6 ± 0.5  | 5.1 ± 1.6   |
| RBC   | 10 <sup>12</sup> /L | 10.0 ± 0.8     | 10.2 ± 0.4 | 10.4 ± 0.6  |
| HGB   | g/L                 | 159 ± 8        | 165 ± 6    | 159 ± 11    |
| HCT   | %                   | 49.3 ± 1.5     | 50.2 ± 4.3 | 51.8 ± 7.9  |
| MCV   | fL                  | 47.1 ± 0.8     | 47.7 ± 1.0 | 48.2 ± 0.9  |
| MCH   | pg                  | 16.3 ± 0.3     | 16.4 ± 0.2 | 16.0 ± 0.3  |
| MCHC  | g/L                 | 333 ± 7        | 331 ± 7    | 335 ± 7     |
| PLT   | 10 <sup>9</sup> /L  | 671 ± 85       | 650 ± 78   | 658 ± 103   |

WBC: white blood cell; Lymph: lymphocyte; RBC: red blood cell; HGB: hemoglobin; HCT: hematocrit; MCV: mean corpuscular volume; MCH: mean corpuscular hemoglobin; MCHC: mean corpuscular hemoglobin concentration; PLT: platelet.
